# Supplementary material
Source: PubMed Central journal article supplement (PMC4493282)
Supplement: cr201575x1.pdf [file cr201575x1.pdf]

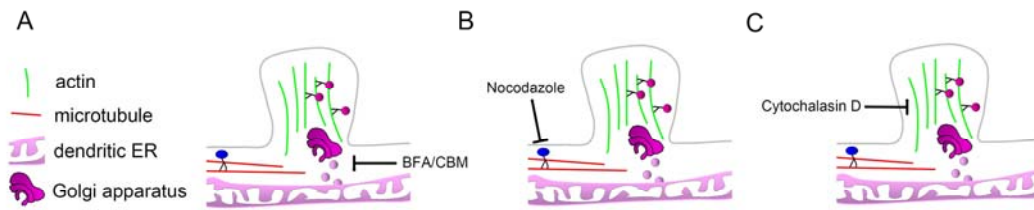

**Supplementary information, Figure S1 (A)** BFA or CBM applying disrupts ER-to-Golgi transport in dendrites. **(B)** Nocodazole interferes with polymerization of microtubules thus prevent sorted vesicle transport along dendrites. **(C)** Cytochalasin D prevents actin monomer polymerization and inhibits synaptic transport.
