# Supplementary material
Source: PubMed Central journal article supplement (PMC4493282)
Supplement: cr201575x2.pdf [file cr201575x2.pdf]

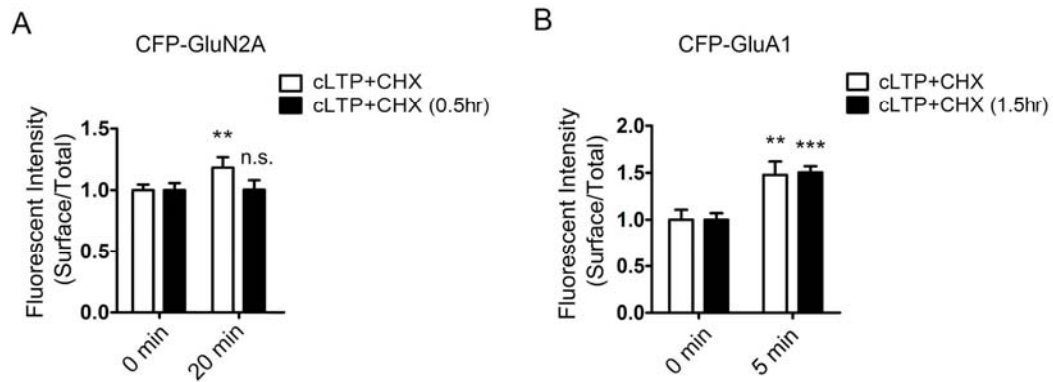

**Supplementary information, Figure S2 (A)** CHX was applied simultaneous or 0.5 h before depolarization (KCl) or cLTP stimulation. The surface expression of CFP-GluA1 was measured 20 min after neuronal stimulation by immunocytochemistry. **(B)** CHX was applied simultaneous or 1.5 h before cLTP stimulation. The surface expression of CFP-GluA1 was measured 5 min after neuronal stimulation by immunocytochemistry. All data are presented as mean  $\pm$  s.e.m.  $n > 20$  for each group. \* $p < 0.05$ ; \*\* $p < 0.01$ , \*\*\* $p < 0.001$
