# Supplementary material
Source: PubMed Central journal article supplement (PMC4493282)
Supplement: cr201575x3.pdf [file cr201575x3.pdf]

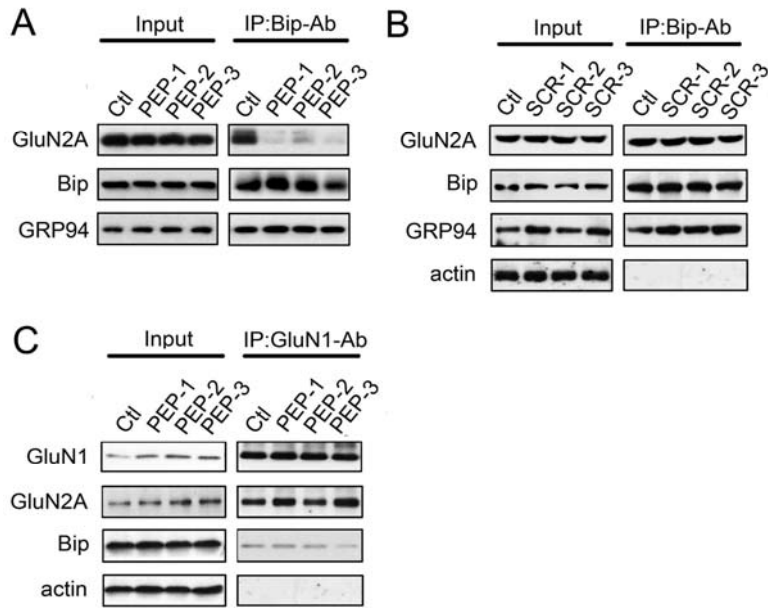

**Supplementary information, Figure S3 (A,B)** The original gel of Figure 7C. Cultured cortical neurons were exposed to 20  $\mu$ m of each disrupting peptide (PEP-1, PEP-2 or PEP-3) or scrambled peptide (SCR-1, SCR-2 or SCR-3) for 1 h, then co-immunoprecipitated by rabbit anti-Bip antibody. GRP94 was used as positive control (n = 4). **(C)** The original gel of Figure 7D. Cultured cortical neurons were exposed to 20  $\mu$ m of each disrupting peptide for 1 h, then co-immunoprecipitated by rabbit anti-GluN1 antibody (n = 4).
