# Supplementary material
Source: PubMed Central journal article supplement (PMC4493282)
Supplement: cr201575x4.pdf [file cr201575x4.pdf]

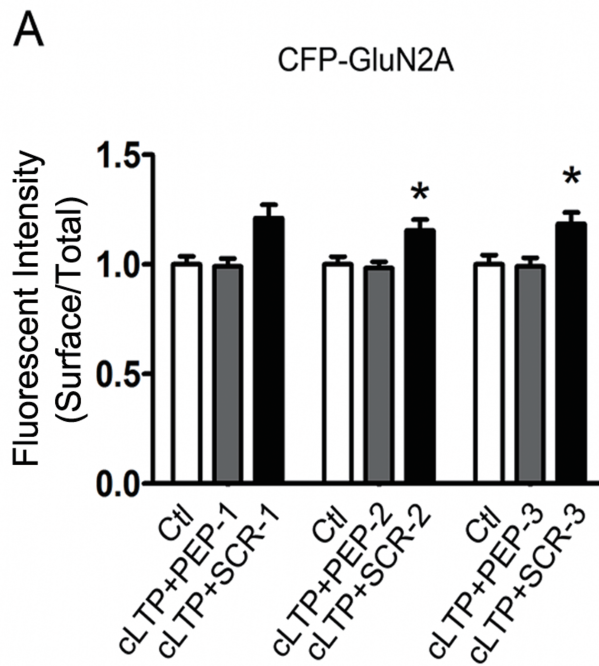

**Supplementary information, Figure S4 (A)** Quantification of the effect of disrupting peptides on surface expression of GluN2A-containing NMDARs induced by neuronal activity. cLTP with PEP-1:  $98.5 \pm 3.6\%$ ,  $n = 26$ ; cLTP with PEP-2:  $98.3 \pm 2.9\%$ ,  $n = 31$ ; cLTP with PEP-3:  $99.1 \pm 4.0\%$ ,  $n = 21$ ; cLTP with SCR-1:  $121 \pm 6.2\%$ ,  $n = 26$ ; cLTP with SCR-2:  $115.4 \pm 5.0\%$ ,  $n = 21$ ; cLTP with SCR-3:  $118.4 \pm 5.3\%$ ,  $n = 21$ . All data are presented as mean  $\pm$  s.e.m. \* $p < 0.05$ ; \*\* $p < 0.01$ .
